# Supplementary material for: Unique phosphine ligand synergy in asymmetric hydroformylation of styrene over the Rh@MOF-5 heterogeneous catalysis system
Source: Royal Society of Chemistry journal article supplement (doi:10.1039/d3nj01897k), 2023-01-01
Supplement: d3nj01897k1.pdf [file d3nj01897k1.pdf]

## Supporting Information

The unique phosphine ligand synergy in asymmetric hydroformylation of styrene over  
Rh@MOF-5 heterogeneous catalysis system

Mengchuan Ma<sup>a</sup> · Chao Zhang<sup>\*a</sup> · Weiping Li<sup>a</sup> · Yong Tao<sup>a</sup> · Li Zhou<sup>b</sup> · Lu Li<sup>c,d</sup> ·  
Zhenmei Guo<sup>a</sup> · Zhiguo Lv<sup>\*a</sup>

*a. State Key Laboratory Base for Eco-chemical Engineering, College of Chemical Engineering, Qingdao University of Science and Technology, Qingdao 266042, China*

*b. Engineering Research Center of Alternative Energy Materials & Devices, Ministry of Education, Sichuan University, Chengdu 610065, China*

*c. Key Laboratory of Auxiliary Chemistry and Technology for Chemical Industry, Ministry of Education, Shaanxi University of Science and Technology, Xi'an, 710021, China.*

*d. Shaanxi Collaborative Innovation Center of Industrial Auxiliary Chemistry and Technology, Shaanxi University of Science and Technology, Xi'an 710021, China.*

*E-mail: [chaozhangchem@qust.edu.cn](mailto:chaozhangchem@qust.edu.cn) [lvzhiguo@qust.edu.cn](mailto:lvzhiguo@qust.edu.cn)*

## 1. Comparison of Performance of Heterogeneous Catalysts of Rh with Previous Reports for Asymmetric Hydroformylation (AHF) of Styrene

**Table S1** Comparison of Performance of Heterogeneous Catalysts of Rh with Previous Reports for AHF of Styrene

| Catalysts                                            | Ligands              | $Y_{iso}$<br>(%) | Iso/n      | $Ee$<br>(%) | Ref |
|------------------------------------------------------|----------------------|------------------|------------|-------------|-----|
| <b>Rh@MOF-5</b>                                      | <b>BINAP</b>         | <b>87</b>        | <b>9.3</b> | <b>25</b>   | --  |
| Rh/DNA                                               | BINAP                | 86               | 16.2       | 29          | 1   |
| Rh/Poly-1                                            | Polymers of<br>BINAP | 84               | 8.5        | 59          | 2   |
| [Me(EO) <sub>16</sub> TMG]<br>[Rh(CO) <sub>4</sub> ] | BINAP                | 73               | 14.2       | 54          | 3   |
| BINAP-Rh/SiO <sub>2</sub>                            | BINAP                | 7                | >99.9      | 59          | 4   |
| Rh-BINAP/SiO <sub>2</sub>                            | BINAP                | 2                | >99.9      | 56          | 4   |
| Rh-L/SiO <sub>2</sub>                                | BINAP                | 6                | 11.5       | 30          | 5   |
| (L= BINAP, DIOP,<br>or MEO-BIPHEP)                   | DIOP                 | 38               | 1.5        | 12          | 5   |
|                                                      | MEO-BIPHEP           | 5                | 11.5       | 25          | 5   |

Compared with the catalytic performance of other classical heterogeneous catalysts, the synergistic system of Rh@MOF-5 and (R)-BINAP showed unique advantages in catalytic performance. The synthesized MOF-5 heterogeneous catalytic material by direct mixing of triethylamine not only had the advantages of cheaper synthesis cost and simpler synthesis method than other polymeric materials (DNA, Poly-BINAP, and ployether ionic liquids), but also had a higher yield of iso-aldehyde in the AHF reaction.

## 2. Characterization Details

The morphological images of the samples were obtained, and the scanning electron microscope (SEM) and transmission electron microscope (TEM) were utilized. Elemental composition and distribution of supplementary analysis were further characterized with Energy Dispersive Spectrometer (EDS). Fourier transform infrared (FT-IR) spectroscopy was utilized to research the chemical structure of the sample. Powder X-ray diffraction (PXRD) patterns were recorded on an X-ray diffractometer with Cu K $\alpha$  radiation (40 kV and 40 mA) in the  $2\theta$  range of 5–50° and a scanning speed of 5°/min. Thermogravimetric analysis (TGA) was employed to analyze the structural stability of the materials, with a sample heated from room temperature (28 °C) up to 700 °C at the rate of 10°C/min, under the air atmosphere. The loading capacity of the active Rh in catalyst was measured with inductively coupled plasma spectrometry optical emission spectrometry (ICP-OES). X-ray photoelectron spectroscopy (XPS) measurements were conducted on the spectrometer, which was equipped with nonmonochromatic Al K $\alpha$  ( $h\nu=1486.6$  eV) radiation. The binding energies of Rh 3d, Zn 2p, and O 1s photoelectron peaks were calibrated using the binding energy C 1s (284.5 eV) neutral peak as a reference. N<sub>2</sub> adsorption-desorption of the catalyst was employed to estimate the specific surface area, pore size distribution, and pore volume of the catalyst. Before the testing, the sample of catalyst was subjected to outgassing under the vacuum at 100 °C for 12 h to remove H<sub>2</sub>O and other impurities. The linear part of the Brunauer-Emmett-Teller (BET) equation was applied to estimate the specific surface area. The pore size distribution

was desorption from the desorption branch of N<sub>2</sub> isotherm, using Barrett–Joyner–Halenda (BJH) method.

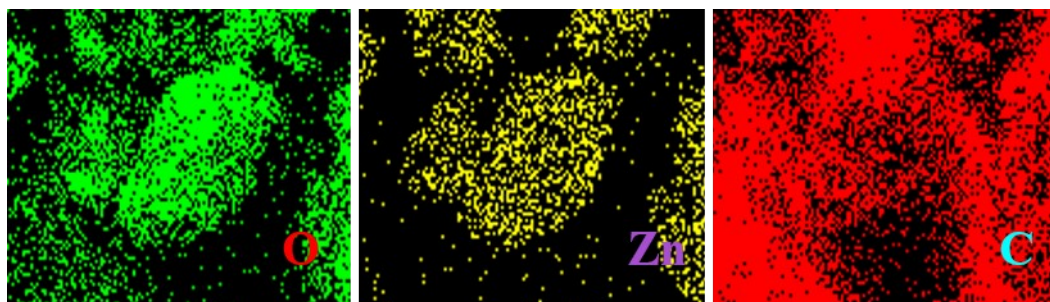

Element distribution in Rh@MOF-5: O, Zn and C.

### 3. DFT Calculations Detail

The overall research carbonyl rhodium complex with styrene was the binding energy, which was calculated as follows:

$$\Delta E(\text{eV}) = 27.212 \times [E_{\text{AB}}(\text{Ha}) - E_{\text{A}}(\text{Ha}) - E_{\text{B}}(\text{Ha})]$$

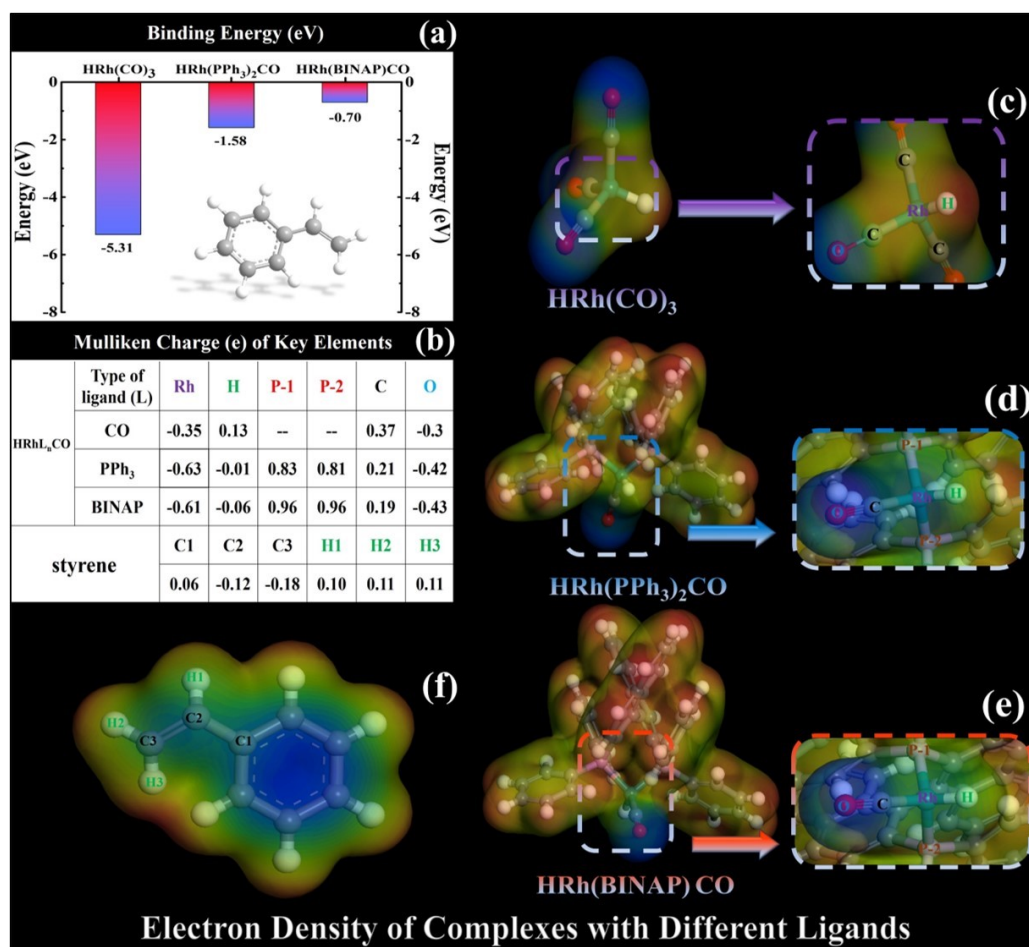

**Fig. S1** The **a** binding energy of styrene with different carbonyl rhodium complexes (HRh(CO)<sub>3</sub>, HRh(PPh<sub>3</sub>)<sub>2</sub>CO, and HRh(BINAP)CO). **b** Mulliken charge and **c-e** electron density of three types of carbonyl rhodium complex and styrene, from blue to red indicated an increase in the electron density.

When HRhL<sub>n</sub>(CO)<sub>2</sub> (L=CO, PPh<sub>3</sub>, or BINAP; n=1, 2) complex was involved in catalysis, one molecule of CO was removed, resulting in the formation of the HRhL<sub>n</sub>CO complex with an empty coordination site. Fig. S1a revealed that a disparity in the binding energies of various HRhL<sub>n</sub>CO complexes and styrene molecules; It was worth noting, the binding energy of HRh(CO)<sub>3</sub> (-5.31 eV) was substantially lower than that of HRh(PPh<sub>3</sub>)<sub>2</sub>CO (-1.58 eV) and HRh(BINAP)CO (-0.70 eV), which

suggested that there was the small kinetic barrier for the hydroformylation of styrene. To quantify this difference, the Mulliken charge and electron density of associated atoms in the  $\text{HRhL}_n\text{CO}$  complex with styrene was calculated and shown in Fig. S1b-f. Compared with 0.35 |e| obtained by  $\text{HRh}(\text{CO})_3$ , 0.63 |e| and 0.61 |e| were obtained by  $\text{HRh}(\text{PPh}_3)_2\text{CO}$  and  $\text{HRh}(\text{BINAP})\text{CO}$  modified by phosphine ligand, respectively. The electron density distribution diagram (Fig. S1c-e) also showed that the electronic density of active Rh in these  $\text{HRhL}_n\text{CO}$  was significantly higher than that of  $\text{HRh}(\text{CO})_3$ , which may be caused by the presence of  $\pi$ -backbonding and stronger electron-donating ability of phosphine ligand <sup>6</sup>. The electronic density of active rhodium increased, which increased the binding energy of  $\pi$  bond to alkenes. This was not conducive to the adsorption and binding of styrene, which explained the longer time required for  $\text{HRh}(\text{BINAP})\text{CO}$  to reach equilibrium. Furthermore, the lower charge of the C2 atom (0.12 |e|) than that of the C3 atom (0.18 |e|) observed in styrene was likely attributed to the effect of  $\pi$ - $\pi$  conjugation <sup>7</sup>. This difference could potentially have an influence on the regioselectivity of the rhodium precursor complexes formed during active Rh inserted to styrene.

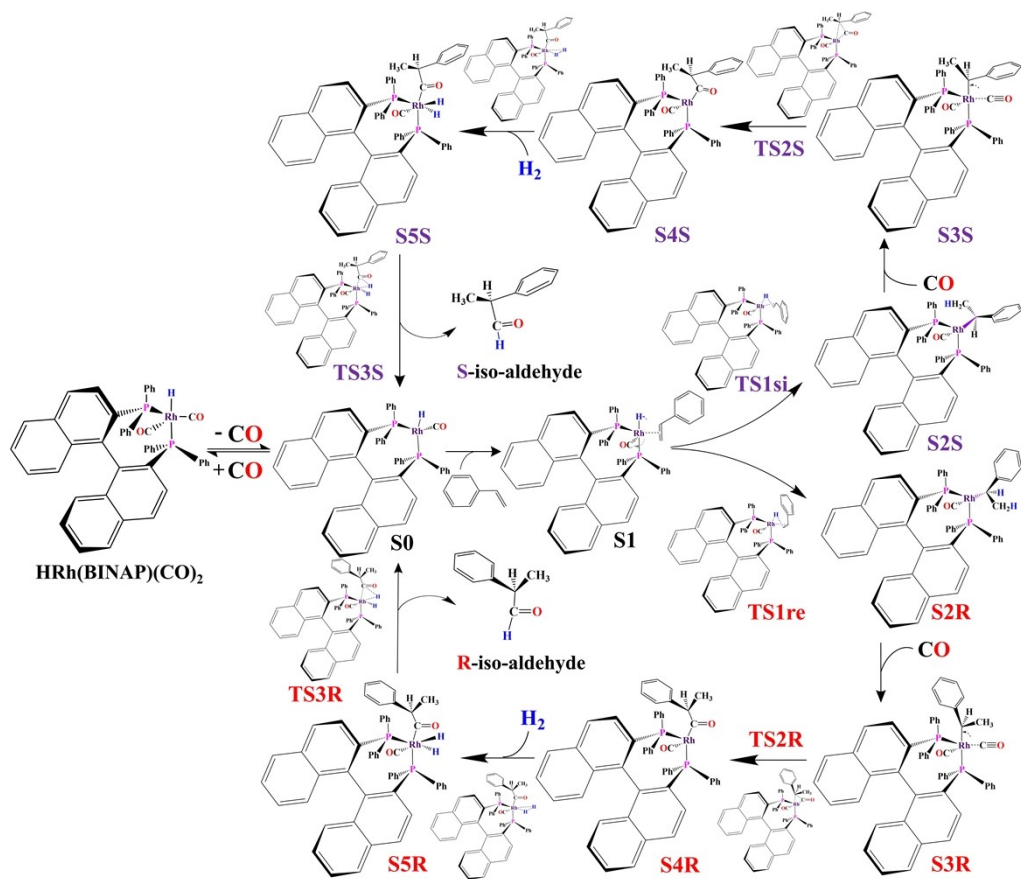

**Fig. S2** The mechanism of AHF reaction catalyzed by  $\text{HRh}(\text{BINAP})(\text{CO})_2$  to prepared optical active iso-aldehydes.

**Table S2** Optimized Cartesian coordinates involved in Fig. 6 for S0

| <b>Atom</b> | <b>X</b> | <b>Y</b> | <b>Z</b> |
|-------------|----------|----------|----------|
| C           | -2.49    | -25.793  | 13.693   |
| C           | -3.713   | -26.035  | 13.192   |
| C           | -4.071   | -26.961  | 12.112   |
| C           | -5.393   | -26.964  | 11.629   |
| C           | -3.152   | -27.853  | 11.527   |
| C           | -3.539   | -28.705  | 10.497   |
| C           | -5.782   | -27.816  | 10.595   |
| C           | -4.857   | -28.694  | 10.027   |
| H           | -2.121   | -27.877  | 11.888   |
| H           | -2.809   | -29.393  | 10.057   |
| H           | -5.158   | -29.366  | 9.218    |
| H           | -6.814   | -27.797  | 10.232   |
| H           | -6.118   | -26.269  | 12.063   |
| H           | -4.558   | -25.48   | 13.615   |
| H           | -2.355   | -25.065  | 14.496   |
| H           | -1.589   | -26.285  | 13.316   |
| C           | -4.667   | -25.092  | 6.247    |
| C           | -2.445   | -24.935  | 5.321    |
| C           | -2.97    | -20.832  | 13.2     |
| C           | -3.724   | -25.493  | 5.295    |
| C           | -3.407   | -20.787  | 15.595   |



|   |        |         |        |
|---|--------|---------|--------|
| C | -2.313 | -21.622 | 15.827 |
| H | -3.954 | -24.147 | 10.054 |
| H | -1.317 | -22.105 | 12.601 |
| H | -0.705 | -22.744 | 14.911 |
| H | -2.052 | -21.926 | 16.845 |
| C | -3.056 | -23.555 | 7.23   |
| C | -5.419 | -23.035 | 11.451 |
| C | -4.331 | -24.147 | 7.216  |
| O | -6.46  | -23.315 | 11.899 |
| C | -2.116 | -23.967 | 6.275  |
| C | -4.948 | -18.448 | 7.109  |
| C | -3.928 | -18.326 | 8.111  |
| C | -3.129 | -19.467 | 8.461  |
| C | -3.392 | -20.709 | 7.862  |
| C | -4.39  | -20.797 | 6.854  |
| C | -5.133 | -19.701 | 6.48   |
| C | -5.73  | -17.316 | 6.765  |
| C | -5.528 | -16.1   | 7.384  |
| C | -4.533 | -15.975 | 8.379  |
| C | -3.753 | -17.057 | 8.73   |
| C | -1.969 | -19.232 | 9.386  |
| C | -0.815 | -18.579 | 8.826  |
| C | 0.303  | -18.264 | 9.668  |

|   |        |         |        |
|---|--------|---------|--------|
| C | 0.225  | -18.573 | 11.048 |
| C | -0.887 | -19.193 | 11.568 |
| C | -1.992 | -19.548 | 10.749 |
| C | -0.728 | -18.237 | 7.446  |
| C | 0.399  | -17.634 | 6.929  |
| C | 1.499  | -17.328 | 7.762  |
| C | 1.449  | -17.641 | 9.104  |
| P | -2.697 | -22.297 | 8.543  |
| P | -3.434 | -20.497 | 11.441 |
| C | -0.86  | -22.172 | 8.459  |
| C | -4.735 | -19.197 | 11.571 |
| C | -0.125 | -22.815 | 9.466  |
| C | 1.272  | -22.813 | 9.431  |
| C | 1.946  | -22.163 | 8.396  |
| C | 1.221  | -21.521 | 7.388  |
| C | -0.175 | -21.529 | 7.418  |
| C | -4.497 | -17.97  | 12.214 |
| C | -5.516 | -17.027 | 12.336 |
| C | -6.78  | -17.285 | 11.793 |
| C | -7.015 | -18.49  | 11.13  |
| C | -5.999 | -19.443 | 11.02  |
| C | -3.734 | -20.395 | 14.293 |
| C | -1.891 | -21.704 | 13.442 |

|   |        |         |        |
|---|--------|---------|--------|
| C | -1.556 | -22.078 | 14.743 |
| H | -4.569 | -21.753 | 6.36   |
| H | -5.885 | -19.79  | 5.689  |
| H | -6.503 | -17.428 | 5.998  |
| H | -6.141 | -15.236 | 7.113  |
| H | -4.388 | -15.017 | 8.884  |
| H | -3     | -16.949 | 9.512  |
| H | 1.063  | -18.31  | 11.702 |
| H | -0.921 | -19.42  | 12.635 |
| H | -1.568 | -18.464 | 6.787  |
| H | 0.44   | -17.381 | 5.866  |
| H | 2.383  | -16.842 | 7.34   |
| H | 2.292  | -17.408 | 9.762  |
| H | -0.657 | -23.32  | 10.277 |
| H | 1.831  | -23.318 | 10.223 |
| H | 3.04   | -22.151 | 8.374  |
| H | 1.741  | -21.007 | 6.575  |
| H | -0.733 | -21.026 | 6.624  |
| H | -3.507 | -17.752 | 12.629 |
| H | -5.327 | -16.084 | 12.858 |
| H | -7.58  | -16.545 | 11.887 |
| H | -7.996 | -18.693 | 10.69  |
| H | -6.177 | -20.386 | 10.496 |

|    |        |         |        |
|----|--------|---------|--------|
| Rh | -3.855 | -22.602 | 10.51  |
| H  | -5.052 | -23.869 | 7.99   |
| H  | -4.018 | -20.438 | 16.432 |
| H  | -4.602 | -19.753 | 14.133 |
| H  | -1.691 | -25.255 | 4.597  |
| H  | -1.106 | -23.553 | 6.282  |
| H  | -3.986 | -26.243 | 4.544  |
| H  | -5.668 | -25.532 | 6.249  |

---

**Table S3** Optimized Cartesian coordinates involved in Fig. 6 for S1 S

| <b>Atom</b> | <b>X</b> | <b>Y</b> | <b>Z</b> |
|-------------|----------|----------|----------|
| C           | -0.099   | -3.277   | 2.82     |
| C           | 0.171    | -3.787   | 1.193    |
| C           | -0.934   | -4.601   | 0.49     |
| C           | -0.543   | -5.524   | -0.679   |
| C           | -2.404   | -4.505   | 0.931    |
| C           | -3.488   | -5.298   | 0.175    |
| C           | -1.624   | -6.318   | -1.433   |
| C           | -3.098   | -6.202   | -1.009   |
| H           | -2.693   | -3.841   | 1.811    |
| H           | -4.58    | -5.213   | 0.491    |
| H           | -3.901   | -6.783   | -1.573   |
| H           | -1.333   | -6.987   | -2.308   |

|   |        |        |        |
|---|--------|--------|--------|
| H | 0.548  | -5.605 | -0.999 |
| H | 1.224  | -4.153 | 0.954  |
| H | 0.834  | -3.462 | 3.448  |
| H | -1.107 | -3.663 | 3.188  |
| C | -2.634 | -3.915 | -2.734 |
| C | -0.542 | -3.727 | -4.376 |
| C | -0.167 | 0.474  | 3.967  |
| C | -1.894 | -4.365 | -4.006 |
| C | -0.939 | 1.33   | 6.372  |
| C | 0.059  | 0.364  | 7.038  |
| H | 1.461  | -1.19  | 3.988  |
| H | 1.668  | -1.276 | 6.659  |
| H | 0.144  | 0.325  | 8.174  |
| C | -0.673 | -2.186 | -2.202 |
| C | -2.195 | -1.936 | 1.023  |
| C | -2.024 | -2.827 | -1.832 |
| O | -3.699 | -2.056 | 0.867  |
| C | 0.07   | -2.641 | -3.471 |
| C | -2.028 | 3.403  | -2.037 |
| C | -0.695 | 3.366  | -1.264 |
| C | -0.1   | 2.019  | -0.815 |
| C | -0.78  | 0.702  | -1.241 |
| C | -2.128 | 0.74   | -1.986 |

|   |        |        |        |
|---|--------|--------|--------|
| C | -2.76  | 2.091  | -2.37  |
| C | -2.629 | 4.752  | -2.47  |
| C | -1.9   | 6.065  | -2.129 |
| C | -0.573 | 6.03   | -1.349 |
| C | 0.029  | 4.68   | -0.916 |
| C | 1.19   | 2.002  | 0.027  |
| C | 2.452  | 2.696  | -0.512 |
| C | 3.753  | 2.683  | 0.314  |
| C | 3.775  | 2.027  | 1.706  |
| C | 2.507  | 1.349  | 2.257  |
| C | 1.222  | 1.315  | 1.41   |
| C | 2.429  | 3.352  | -1.904 |
| C | 3.712  | 3.976  | -2.481 |
| C | 5.014  | 3.957  | -1.658 |
| C | 5.031  | 3.319  | -0.257 |
| P | 0.115  | -0.93  | -1.061 |
| P | -0.32  | 0.516  | 2.105  |
| C | 1.927  | -0.775 | -1.493 |
| C | -1.758 | 1.602  | 1.597  |
| C | 2.994  | -1.369 | -0.555 |
| C | 4.487  | -1.24  | -0.906 |
| C | 4.915  | -0.506 | -2.19  |
| C | 3.849  | 0.108  | -3.117 |

|   |        |        |        |
|---|--------|--------|--------|
| C | 2.355  | -0.021 | -2.765 |
| C | -1.612 | 3.133  | 1.7    |
| C | -2.779 | 4.05   | 1.293  |
| C | -4.09  | 3.438  | 0.77   |
| C | -4.226 | 1.909  | 0.634  |
| C | -3.055 | 0.992  | 1.037  |
| C | -1.055 | 1.382  | 4.837  |
| C | 0.819  | -0.503 | 4.632  |
| C | 0.936  | -0.554 | 6.167  |
| H | -2.646 | -0.234 | -2.274 |
| H | -3.759 | 2.118  | -2.918 |
| H | -3.613 | 4.779  | -3.044 |
| H | -2.343 | 7.064  | -2.456 |
| H | -0.032 | 7.002  | -1.099 |
| H | 1.015  | 4.652  | -0.344 |
| H | 4.73   | 2.042  | 2.328  |
| H | 2.52   | 0.868  | 3.29   |
| H | 1.466  | 3.358  | -2.515 |
| H | 3.701  | 4.446  | -3.52  |
| H | 5.966  | 4.417  | -2.086 |
| H | 5.992  | 3.315  | 0.356  |
| H | 2.678  | -1.913 | 0.396  |
| H | 5.275  | -1.692 | -0.218 |

|    |        |        |        |
|----|--------|--------|--------|
| H  | 6.02   | -0.417 | -2.454 |
| H  | 4.166  | 0.658  | -4.064 |
| H  | 1.567  | 0.439  | -3.448 |
| H  | -0.639 | 3.586  | 2.085  |
| H  | -2.675 | 5.181  | 1.389  |
| H  | -4.961 | 4.115  | 0.482  |
| H  | -5.194 | 1.456  | 0.238  |
| H  | -3.154 | -0.136 | 0.929  |
| Rh | -0.063 | -1.777 | 1.24   |
| H  | -2.57  | -2.5   | -0.889 |
| H  | -1.592 | 2.007  | 7.016  |
| H  | -1.793 | 2.097  | 4.344  |
| H  | 0.005  | -4.059 | -5.319 |
| H  | 1.076  | -2.176 | -3.739 |
| H  | -2.346 | -5.171 | -4.674 |
| H  | -3.631 | -4.393 | -2.454 |
| H  | 1.669  | -1.582 | 1.423  |

**Table S4** Optimized Cartesian coordinates involved in Fig. 6 for S1 R(or n)

| <b>Atom</b> | <b>X</b> | <b>Y</b> | <b>Z</b> |
|-------------|----------|----------|----------|
| C           | 0.952    | -2.852   | 1.561    |
| C           | -0.251   | -3.076   | 2.29     |
| C           | -0.952   | -4.38    | 2.372    |



---

|   |        |        |        |
|---|--------|--------|--------|
| C | -1.87  | -4.598 | 3.416  |
| C | -0.705 | -5.451 | 1.492  |
| C | -1.335 | -6.683 | 1.657  |
| C | -2.504 | -5.83  | 3.583  |
| C | -2.24  | -6.883 | 2.705  |
| H | -0.017 | -5.315 | 0.654  |
| H | -1.119 | -7.497 | 0.959  |
| H | -2.733 | -7.85  | 2.836  |
| H | -3.205 | -5.969 | 4.412  |
| H | -2.08  | -3.78  | 4.113  |
| H | -0.422 | -2.45  | 3.17   |
| H | 1.699  | -2.17  | 1.975  |
| H | 1.388  | -3.681 | 0.997  |
| C | -1.761 | -3.502 | -4.155 |
| C | 0.426  | -3.163 | -5.109 |
| C | -0.18  | 0.194  | 3.419  |
| C | -0.847 | -3.728 | -5.188 |
| C | -1.189 | 0.167  | 5.642  |
| C | -0.016 | -0.355 | 6.191  |
| H | -0.744 | -3.202 | -0.23  |
| H | 1.827  | -0.639 | 3.351  |
| H | 1.98   | -1.064 | 5.765  |
| H | 0.049  | -0.559 | 7.263  |

---

---

|   |        |        |        |
|---|--------|--------|--------|
| C | -0.132 | -2.117 | -2.981 |
| C | -2.562 | -1.865 | 0.366  |
| C | -1.402 | -2.72  | -3.056 |
| O | -3.702 | -2.091 | 0.276  |
| C | 0.779  | -2.363 | -4.02  |
| C | -1.953 | 2.975  | -2.534 |
| C | -0.905 | 2.994  | -1.551 |
| C | -0.143 | 1.796  | -1.286 |
| C | -0.463 | 0.612  | -1.967 |
| C | -1.526 | 0.619  | -2.915 |
| C | -2.237 | 1.759  | -3.199 |
| C | -2.677 | 4.161  | -2.821 |
| C | -2.4   | 5.337  | -2.158 |
| C | -1.39  | 5.358  | -1.169 |
| C | -0.666 | 4.222  | -0.873 |
| C | 1.024  | 1.92   | -0.345 |
| C | 2.153  | 2.689  | -0.81  |
| C | 3.27   | 2.926  | 0.06   |
| C | 3.219  | 2.419  | 1.379  |
| C | 2.132  | 1.698  | 1.813  |
| C | 1.025  | 1.418  | 0.967  |
| C | 2.216  | 3.245  | -2.121 |
| C | 3.303  | 3.985  | -2.538 |

---

---

|   |        |        |        |
|---|--------|--------|--------|
| C | 4.398  | 4.211  | -1.673 |
| C | 4.378  | 3.688  | -0.399 |
| P | 0.276  | -1.039 | -1.514 |
| P | -0.401 | 0.367  | 1.58   |
| C | 2.092  | -0.792 | -1.763 |
| C | -1.758 | 1.629  | 1.505  |
| C | 2.986  | -1.528 | -0.972 |
| C | 4.365  | -1.428 | -1.174 |
| C | 4.868  | -0.583 | -2.165 |
| C | 3.987  | 0.154  | -2.961 |
| C | 2.609  | 0.047  | -2.765 |
| C | -1.639 | 2.844  | 2.205  |
| C | -2.659 | 3.794  | 2.149  |
| C | -3.804 | 3.551  | 1.382  |
| C | -3.919 | 2.359  | 0.669  |
| C | -2.903 | 1.401  | 0.736  |
| C | -1.271 | 0.439  | 4.275  |
| C | 0.979  | -0.374 | 3.982  |
| C | 1.064  | -0.631 | 5.353  |
| H | -1.772 | -0.3   | -3.447 |
| H | -3.034 | 1.736  | -3.95  |
| H | -3.46  | 4.122  | -3.584 |
| H | -2.96  | 6.248  | -2.387 |

---

---

|    |        |        |        |
|----|--------|--------|--------|
| H  | -1.184 | 6.284  | -0.625 |
| H  | 0.102  | 4.261  | -0.098 |
| H  | 4.055  | 2.616  | 2.056  |
| H  | 2.116  | 1.36   | 2.848  |
| H  | 1.38   | 3.091  | -2.806 |
| H  | 3.314  | 4.403  | -3.549 |
| H  | 5.251  | 4.804  | -2.015 |
| H  | 5.215  | 3.855  | 0.285  |
| H  | 2.59   | -2.18  | -0.193 |
| H  | 5.044  | -2.011 | -0.547 |
| H  | 5.947  | -0.494 | -2.315 |
| H  | 4.371  | 0.826  | -3.734 |
| H  | 1.929  | 0.626  | -3.395 |
| H  | -0.745 | 3.045  | 2.802  |
| H  | -2.557 | 4.731  | 2.705  |
| H  | -4.599 | 4.301  | 1.335  |
| H  | -4.801 | 2.167  | 0.053  |
| H  | -2.992 | 0.478  | 0.163  |
| Rh | -0.663 | -1.796 | 0.501  |
| H  | -2.115 | -2.577 | -2.242 |
| H  | -2.055 | 0.367  | 6.28   |
| H  | -2.201 | 0.842  | 3.872  |
| H  | 1.157  | -3.343 | -5.902 |

---

---

|   |        |        |        |
|---|--------|--------|--------|
| H | 1.783  | -1.935 | -3.988 |
| H | -1.12  | -4.352 | -6.042 |
| H | -2.759 | -3.945 | -4.196 |

---

**Table S5** Optimized Cartesian coordinates involved in Fig. 6 for S2 (S)

---

| <b>Atom</b> | <b>X</b> | <b>Y</b> | <b>Z</b> |
|-------------|----------|----------|----------|
| C           | -0.025   | -3.984   | 2.627    |
| C           | -0.067   | -3.562   | 1.151    |
| C           | -0.719   | -4.589   | 0.286    |
| C           | -0.007   | -5.196   | -0.766   |
| C           | -2.029   | -5.051   | 0.524    |
| C           | -2.594   | -6.066   | -0.247   |
| C           | -0.569   | -6.21    | -1.544   |
| C           | -1.868   | -6.655   | -1.288   |
| H           | -2.617   | -4.595   | 1.325    |
| H           | -3.614   | -6.403   | -0.033   |
| H           | -2.31    | -7.453   | -1.892   |
| H           | 0.014    | -6.66    | -2.354   |
| H           | 1.018    | -4.869   | -0.971   |
| H           | 0.974    | -3.444   | 0.798    |
| H           | 0.547    | -4.928   | 2.749    |
| H           | -1.032   | -4.154   | 3.039    |
| C           | -2.516   | -3.498   | -2.874   |
| C           | -0.554   | -3.418   | -4.275   |

---

|   |        |        |        |
|---|--------|--------|--------|
| C | -0.209 | 0.617  | 3.732  |
| C | -1.841 | -3.897 | -4.029 |
| C | -0.763 | 1.134  | 6.043  |
| C | 0.16   | 0.191  | 6.495  |
| H | 1.246  | -0.967 | 3.48   |
| H | 1.604  | -1.312 | 5.902  |
| H | 0.304  | 0.032  | 7.568  |
| C | -0.622 | -2.113 | -2.225 |
| C | -2.257 | -1.821 | 2.121  |
| C | -1.91  | -2.62  | -1.976 |
| O | -3.364 | -1.938 | 2.484  |
| C | 0.055  | -2.535 | -3.379 |
| C | -1.83  | 3.155  | -2.217 |
| C | -0.683 | 3.159  | -1.357 |
| C | -0.058 | 1.912  | -0.988 |
| C | -0.566 | 0.706  | -1.492 |
| C | -1.704 | 0.735  | -2.344 |
| C | -2.32  | 1.915  | -2.688 |
| C | -2.44  | 4.384  | -2.589 |
| C | -1.946 | 5.586  | -2.13  |
| C | -0.818 | 5.598  | -1.279 |
| C | -0.208 | 4.421  | -0.898 |
| C | 1.142  | 1.961  | -0.087 |
| C | 2.379  | 2.481  | -0.604 |

|   |        |        |        |
|---|--------|--------|--------|
| C | 3.53   | 2.564  | 0.25   |
| C | 3.406  | 2.157  | 1.601  |
| C | 2.211  | 1.677  | 2.087  |
| C | 1.063  | 1.561  | 1.256  |
| C | 2.518  | 2.938  | -1.947 |
| C | 3.713  | 3.45   | -2.41  |
| C | 4.844  | 3.515  | -1.565 |
| C | 4.751  | 3.074  | -0.263 |
| P | 0.091  | -0.962 | -0.957 |
| P | -0.483 | 0.748  | 1.904  |
| C | 1.881  | -0.886 | -1.416 |
| C | -1.754 | 2.074  | 1.768  |
| C | 2.811  | -1.418 | -0.512 |
| C | 4.172  | -1.446 | -0.824 |
| C | 4.62   | -0.94  | -2.045 |
| C | 3.705  | -0.391 | -2.945 |
| C | 2.346  | -0.358 | -2.63  |
| C | -1.467 | 3.409  | 2.096  |
| C | -2.455 | 4.388  | 1.989  |
| C | -3.739 | 4.045  | 1.557  |
| C | -4.032 | 2.719  | 1.234  |
| C | -3.045 | 1.736  | 1.34   |
| C | -0.945 | 1.351  | 4.673  |
| C | 0.697  | -0.352 | 4.2    |

|    |        |        |        |
|----|--------|--------|--------|
| C  | 0.89   | -0.556 | 5.565  |
| H  | -2.095 | -0.201 | -2.742 |
| H  | -3.195 | 1.905  | -3.346 |
| H  | -3.313 | 4.354  | -3.248 |
| H  | -2.418 | 6.527  | -2.424 |
| H  | -0.429 | 6.553  | -0.913 |
| H  | 0.658  | 4.458  | -0.235 |
| H  | 4.272  | 2.248  | 2.264  |
| H  | 2.143  | 1.395  | 3.138  |
| H  | 1.66   | 2.882  | -2.619 |
| H  | 3.781  | 3.81   | -3.44  |
| H  | 5.787  | 3.918  | -1.945 |
| H  | 5.616  | 3.117  | 0.405  |
| H  | 2.462  | -1.802 | 0.45   |
| H  | 4.886  | -1.858 | -0.106 |
| H  | 5.684  | -0.969 | -2.294 |
| H  | 4.054  | 0.025  | -3.894 |
| H  | 1.64   | 0.093  | -3.333 |
| H  | -0.463 | 3.689  | 2.427  |
| H  | -2.217 | 5.426  | 2.239  |
| H  | -4.51  | 4.816  | 1.472  |
| H  | -5.034 | 2.441  | 0.896  |
| H  | -3.271 | 0.699  | 1.078  |
| Rh | -0.671 | -1.459 | 1.17   |



|   |        |        |        |
|---|--------|--------|--------|
| H | -2.419 | -2.346 | -1.046 |
| H | -1.355 | 1.712  | 6.758  |
| H | -1.679 | 2.087  | 4.341  |
| H | -0.007 | -3.742 | -5.166 |
| H | 1.073  | -2.2   | -3.583 |
| H | -2.307 | -4.601 | -4.724 |
| H | -3.505 | -3.903 | -2.644 |
| H | 0.457  | -3.221 | 3.26   |

**Table S6** Optimized Cartesian coordinates involved in Fig. 6 for S2 (R)

| <b>Atom</b> | <b>X</b> | <b>Y</b> | <b>Z</b> |
|-------------|----------|----------|----------|
| C           | 1.079    | -2.88    | 1.77     |
| C           | -0.435   | -2.753   | 1.836    |
| C           | -1.135   | -4.058   | 1.653    |
| C           | -2.127   | -4.461   | 2.568    |
| C           | -0.787   | -4.96    | 0.627    |
| C           | -1.395   | -6.209   | 0.525    |
| C           | -2.737   | -5.713   | 2.469    |
| C           | -2.371   | -6.595   | 1.45     |
| H           | -0.033   | -4.671   | -0.109   |
| H           | -1.096   | -6.893   | -0.275   |
| H           | -2.839   | -7.581   | 1.38     |
| H           | -3.494   | -6.007   | 3.202    |

|   |        |        |        |
|---|--------|--------|--------|
| H | -2.412 | -3.779 | 3.375  |
| H | -0.748 | -2.3   | 2.79   |
| H | 1.58   | -1.905 | 1.811  |
| H | 1.434  | -3.487 | 2.628  |
| C | -1.473 | -4.054 | -3.641 |
| C | 0.387  | -3.324 | -4.994 |
| C | -0.251 | 0.354  | 3.594  |
| C | -0.756 | -4.114 | -4.838 |
| C | -1.225 | 0.269  | 5.831  |
| C | -0.074 | -0.343 | 6.332  |
| H | 1.401  | -3.386 | 0.849  |
| H | 1.729  | -0.534 | 3.451  |
| H | 1.885  | -1.115 | 5.837  |
| H | -0.003 | -0.613 | 7.39   |
| C | 0.07   | -2.374 | -2.774 |
| C | -2.81  | -1.898 | 0.372  |
| C | -1.057 | -3.2   | -2.617 |
| O | -3.958 | -2.128 | 0.327  |
| C | 0.799  | -2.466 | -3.971 |
| C | -2.012 | 2.624  | -2.455 |
| C | -0.953 | 2.749  | -1.493 |
| C | -0.14  | 1.608  | -1.15  |
| C | -0.415 | 0.361  | -1.762 |
| C | -1.504 | 0.263  | -2.682 |

|   |        |        |        |
|---|--------|--------|--------|
| C | -2.263 | 1.354  | -3.027 |
| C | -2.778 | 3.763  | -2.811 |
| C | -2.53  | 4.992  | -2.236 |
| C | -1.502 | 5.121  | -1.275 |
| C | -0.741 | 4.03   | -0.912 |
| C | 1.012  | 1.873  | -0.213 |
| C | 2.152  | 2.597  | -0.714 |
| C | 3.243  | 2.917  | 0.167  |
| C | 3.137  | 2.575  | 1.536  |
| C | 2.018  | 1.938  | 2.015  |
| C | 0.952  | 1.558  | 1.155  |
| C | 2.247  | 3.046  | -2.062 |
| C | 3.353  | 3.735  | -2.515 |
| C | 4.439  | 4.007  | -1.653 |
| C | 4.38   | 3.606  | -0.336 |
| P | 0.495  | -1.224 | -1.358 |
| P | -0.505 | 0.602  | 1.779  |
| C | 2.262  | -0.84  | -1.766 |
| C | -1.816 | 1.915  | 1.774  |
| C | 3.273  | -1.444 | -1.005 |
| C | 4.619  | -1.274 | -1.341 |
| C | 4.972  | -0.499 | -2.447 |
| C | 3.974  | 0.117  | -3.205 |
| C | 2.63   | -0.05  | -2.866 |

|   |        |        |        |
|---|--------|--------|--------|
| C | -1.6   | 3.163  | 2.382  |
| C | -2.6   | 4.137  | 2.374  |
| C | -3.821 | 3.886  | 1.739  |
| C | -4.036 | 2.655  | 1.118  |
| C | -3.042 | 1.672  | 1.144  |
| C | -1.313 | 0.611  | 4.481  |
| C | 0.896  | -0.284 | 4.109  |
| C | 0.983  | -0.622 | 5.462  |
| H | -1.715 | -0.701 | -3.146 |
| H | -3.071 | 1.25   | -3.758 |
| H | -3.577 | 3.646  | -3.55  |
| H | -3.128 | 5.864  | -2.515 |
| H | -1.31  | 6.092  | -0.809 |
| H | 0.043  | 4.147  | -0.162 |
| H | 3.945  | 2.856  | 2.218  |
| H | 1.936  | 1.739  | 3.085  |
| H | 1.42   | 2.847  | -2.746 |
| H | 3.389  | 4.077  | -3.553 |
| H | 5.314  | 4.544  | -2.029 |
| H | 5.202  | 3.824  | 0.354  |
| H | 3.006  | -2.054 | -0.14  |
| H | 5.392  | -1.753 | -0.734 |
| H | 6.024  | -0.371 | -2.717 |
| H | 4.238  | 0.739  | -4.065 |

|    |        |        |        |
|----|--------|--------|--------|
| H  | 1.859  | 0.441  | -3.465 |
| H  | -0.648 | 3.371  | 2.878  |
| H  | -2.427 | 5.101  | 2.863  |
| H  | -4.605 | 4.649  | 1.732  |
| H  | -4.977 | 2.459  | 0.597  |
| H  | -3.212 | 0.704  | 0.668  |
| Rh | -1.03  | -1.255 | 0.447  |
| H  | -1.613 | -3.151 | -1.676 |
| H  | -2.065 | 0.488  | 6.496  |
| H  | -2.225 | 1.081  | 4.11   |
| H  | 0.963  | -3.372 | -5.923 |
| H  | 1.7    | -1.869 | -4.117 |
| H  | -1.078 | -4.78  | -5.644 |
| H  | -2.364 | -4.673 | -3.497 |

---

**Table S7** Optimized Cartesian coordinates involved in Fig. 6 for S2 (n)

| <b>Atom</b> | <b>X</b> | <b>Y</b> | <b>Z</b> |
|-------------|----------|----------|----------|
| C           | 0.406    | -3.614   | 0.216    |
| C           | 0.451    | -4.551   | 1.432    |
| C           | -0.879   | -5.078   | 1.927    |
| C           | -1.204   | -5.049   | 3.29     |
| C           | -1.821   | -5.621   | 1.04     |
| C           | -3.046   | -6.106   | 1.499    |

|   |        |        |        |
|---|--------|--------|--------|
| C | -2.426 | -5.536 | 3.758  |
| C | -3.356 | -6.065 | 2.861  |
| H | -1.599 | -5.653 | -0.031 |
| H | -3.771 | -6.511 | 0.787  |
| H | -4.321 | -6.434 | 3.22   |
| H | -2.659 | -5.489 | 4.826  |
| H | -0.488 | -4.62  | 3.999  |
| H | 1.083  | -5.431 | 1.174  |
| H | 1.434  | -3.514 | -0.181 |
| H | -0.188 | -4.056 | -0.596 |
| C | -1.611 | -3.613 | -3.549 |
| C | 0.448  | -3.333 | -4.778 |
| C | -0.219 | 0.356  | 3.363  |
| C | -0.806 | -3.931 | -4.647 |
| C | -0.971 | 0.627  | 5.659  |
| C | 0.052  | -0.207 | 6.108  |
| H | 0.966  | -4.056 | 2.273  |
| H | 1.465  | -0.98  | 3.103  |
| H | 1.736  | -1.438 | 5.525  |
| H | 0.155  | -0.427 | 7.174  |
| C | 0.095  | -2.082 | -2.725 |
| C | -1.777 | -2.226 | 1.561  |
| C | -1.159 | -2.705 | -2.593 |
| O | -2.866 | -2.429 | 1.928  |

|   |        |        |        |
|---|--------|--------|--------|
| C | 0.897  | -2.413 | -3.825 |
| C | -1.859 | 2.946  | -2.622 |
| C | -0.829 | 3.063  | -1.63  |
| C | -0.026 | 1.917  | -1.29  |
| C | -0.272 | 0.687  | -1.917 |
| C | -1.291 | 0.605  | -2.906 |
| C | -2.054 | 1.695  | -3.251 |
| C | -2.645 | 4.079  | -2.957 |
| C | -2.438 | 5.294  | -2.339 |
| C | -1.433 | 5.415  | -1.353 |
| C | -0.653 | 4.331  | -1.008 |
| C | 1.082  | 2.116  | -0.294 |
| C | 2.229  | 2.886  | -0.694 |
| C | 3.269  | 3.164  | 0.258  |
| C | 3.13   | 2.675  | 1.578  |
| C | 2.028  | 1.94   | 1.946  |
| C | 0.99   | 1.644  | 1.022  |
| C | 2.381  | 3.414  | -2.008 |
| C | 3.481  | 4.17   | -2.356 |
| C | 4.5    | 4.437  | -1.413 |
| C | 4.392  | 3.939  | -0.133 |
| P | 0.578  | -0.888 | -1.388 |
| P | -0.414 | 0.533  | 1.529  |
| C | 2.365  | -0.562 | -1.724 |

|   |        |        |        |
|---|--------|--------|--------|
| C | -1.891 | 1.622  | 1.366  |
| C | 3.311  | -1.042 | -0.807 |
| C | 4.676  | -0.833 | -1.022 |
| C | 5.107  | -0.135 | -2.153 |
| C | 4.172  | 0.354  | -3.068 |
| C | 2.809  | 0.143  | -2.855 |
| C | -1.883 | 2.96   | 1.793  |
| C | -3.037 | 3.739  | 1.698  |
| C | -4.209 | 3.196  | 1.165  |
| C | -4.221 | 1.869  | 0.73   |
| C | -3.067 | 1.086  | 0.825  |
| C | -1.106 | 0.911  | 4.297  |
| C | 0.794  | -0.504 | 3.826  |
| C | 0.941  | -0.768 | 5.186  |
| H | -1.466 | -0.342 | -3.417 |
| H | -2.825 | 1.604  | -4.022 |
| H | -3.423 | 3.969  | -3.719 |
| H | -3.052 | 6.159  | -2.602 |
| H | -1.28  | 6.373  | -0.848 |
| H | 0.11   | 4.44   | -0.236 |
| H | 3.907  | 2.907  | 2.314  |
| H | 1.942  | 1.593  | 2.977  |
| H | 1.606  | 3.217  | -2.751 |
| H | 3.562  | 4.57   | -3.371 |



|    |        |        |        |
|----|--------|--------|--------|
| H  | 5.365  | 5.042  | -1.698 |
| H  | 5.172  | 4.138  | 0.609  |
| H  | 2.971  | -1.572 | 0.087  |
| H  | 5.404  | -1.205 | -0.296 |
| H  | 6.175  | 0.036  | -2.316 |
| H  | 4.505  | 0.913  | -3.947 |
| H  | 2.084  | 0.541  | -3.57  |
| H  | -0.971 | 3.396  | 2.209  |
| H  | -3.018 | 4.781  | 2.032  |
| H  | -5.111 | 3.809  | 1.08   |
| H  | -5.13  | 1.439  | 0.3    |
| H  | -3.072 | 0.052  | 0.472  |
| Rh | -0.242 | -1.617 | 0.649  |
| H  | -1.769 | -2.483 | -1.712 |
| H  | -1.684 | 1.055  | 6.37   |
| H  | -1.923 | 1.554  | 3.962  |
| H  | 1.091  | -3.584 | -5.625 |
| H  | 1.884  | -1.961 | -3.94  |
| H  | -1.151 | -4.654 | -5.392 |
| H  | -2.587 | -4.09  | -3.426 |

---

**Table S8** Optimized Cartesian coordinates involved in Fig. 6 for S3

| Atom | X      | Y      | Z      |
|------|--------|--------|--------|
| C    | 0.44   | -4.482 | 2.522  |
| C    | 0.327  | -3.828 | 1.139  |
| C    | -0.577 | -4.595 | 0.224  |
| C    | -0.097 | -5.042 | -1.022 |
| C    | -1.867 | -5.014 | 0.604  |
| C    | -2.634 | -5.841 | -0.217 |
| C    | -0.859 | -5.875 | -1.843 |
| C    | -2.132 | -6.284 | -1.444 |
| H    | -2.277 | -4.695 | 1.564  |
| H    | -3.63  | -6.152 | 0.113  |
| H    | -2.731 | -6.937 | -2.084 |
| H    | -0.451 | -6.208 | -2.802 |
| H    | 0.902  | -4.735 | -1.347 |
| H    | 1.323  | -3.825 | 0.677  |
| H    | 0.714  | -5.551 | 2.419  |
| H    | -0.505 | -4.44  | 3.085  |
| C    | -2.87  | -3.1   | -2.698 |
| C    | -1.108 | -3.006 | -4.344 |
| C    | -0.355 | 0.92   | 3.894  |
| C    | -2.391 | -3.409 | -3.973 |
| C    | -0.964 | 2.124  | 5.922  |
| C    | -0.264 | 1.202  | 6.703  |

|   |        |        |        |
|---|--------|--------|--------|
| H | 0.78   | -0.889 | 4.228  |
| H | 0.908  | -0.616 | 6.68   |
| H | -0.229 | 1.314  | 7.791  |
| C | -0.792 | -1.946 | -2.179 |
| C | -1.695 | -2.112 | 2.207  |
| C | -2.073 | -2.385 | -1.805 |
| O | -2.644 | -2.433 | 2.812  |
| C | -0.314 | -2.274 | -3.457 |
| C | -1.633 | 3.306  | -2.144 |
| C | -0.513 | 3.259  | -1.248 |
| C | 0.059  | 1.985  | -0.876 |
| C | -0.468 | 0.803  | -1.419 |
| C | -1.578 | 0.89   | -2.307 |
| C | -2.144 | 2.092  | -2.654 |
| C | -2.197 | 4.556  | -2.508 |
| C | -1.682 | 5.738  | -2.019 |
| C | -0.579 | 5.702  | -1.138 |
| C | -0.018 | 4.5    | -0.755 |
| C | 1.218  | 2.01   | 0.077  |
| C | 2.482  | 2.511  | -0.394 |
| C | 3.6    | 2.596  | 0.503  |
| C | 3.416  | 2.227  | 1.858  |
| C | 2.2    | 1.766  | 2.304  |
| C | 1.091  | 1.634  | 1.422  |

|   |        |        |        |
|---|--------|--------|--------|
| C | 2.676  | 2.956  | -1.732 |
| C | 3.896  | 3.432  | -2.163 |
| C | 5      | 3.483  | -1.281 |
| C | 4.849  | 3.073  | 0.026  |
| P | 0.152  | -0.91  | -0.964 |
| P | -0.372 | 0.685  | 2.046  |
| C | 1.852  | -0.925 | -1.704 |
| C | -1.865 | 1.651  | 1.562  |
| C | 2.803  | -1.809 | -1.178 |
| C | 4.071  | -1.925 | -1.752 |
| C | 4.41   | -1.149 | -2.86  |
| C | 3.474  | -0.259 | -3.389 |
| C | 2.203  | -0.15  | -2.821 |
| C | -1.876 | 3.055  | 1.622  |
| C | -3.04  | 3.77   | 1.341  |
| C | -4.21  | 3.089  | 0.995  |
| C | -4.206 | 1.695  | 0.921  |
| C | -3.041 | 0.978  | 1.203  |
| C | -1.008 | 1.987  | 4.534  |
| C | 0.316  | -0.02  | 4.694  |
| C | 0.373  | 0.127  | 6.082  |
| H | -1.993 | -0.021 | -2.734 |
| H | -2.992 | 2.117  | -3.345 |
| H | -3.052 | 4.56   | -3.19  |

|    |        |        |        |
|----|--------|--------|--------|
| H  | -2.113 | 6.697  | -2.318 |
| H  | -0.162 | 6.638  | -0.755 |
| H  | 0.828  | 4.503  | -0.066 |
| H  | 4.256  | 2.317  | 2.553  |
| H  | 2.085  | 1.494  | 3.355  |
| H  | 1.838  | 2.923  | -2.429 |
| H  | 4.009  | 3.772  | -3.196 |
| H  | 5.966  | 3.852  | -1.635 |
| H  | 5.689  | 3.116  | 0.724  |
| H  | 2.555  | -2.409 | -0.303 |
| H  | 4.796  | -2.623 | -1.323 |
| H  | 5.406  | -1.227 | -3.305 |
| H  | 3.733  | 0.363  | -4.251 |
| H  | 1.478  | 0.548  | -3.248 |
| H  | -0.957 | 3.597  | 1.863  |
| H  | -3.023 | 4.862  | 1.379  |
| H  | -5.122 | 3.651  | 0.772  |
| H  | -5.118 | 1.158  | 0.643  |
| H  | -3.041 | -0.111 | 1.13   |
| Rh | -0.066 | -1.584 | 1.389  |
| H  | -2.436 | -2.17  | -0.796 |
| H  | -1.486 | 2.96   | 6.396  |
| H  | -1.581 | 2.711  | 3.954  |
| H  | -0.718 | -3.258 | -5.335 |

|   |        |        |        |
|---|--------|--------|--------|
| H | 0.685  | -1.963 | -3.768 |
| H | -3.01  | -3.987 | -4.665 |
| H | -3.862 | -3.435 | -2.385 |
| H | 1.207  | -3.992 | 3.141  |
| C | 1.733  | -1.627 | 2.04   |
| O | 2.819  | -1.723 | 2.456  |

---

**Table S9** Optimized Cartesian coordinates involved in Fig. 6 for S4

| <b>Atom</b> | <b>X</b> | <b>Y</b> | <b>Z</b> |
|-------------|----------|----------|----------|
| C           | -0.41    | -5.215   | 2.588    |
| C           | -0.131   | -4.515   | 1.244    |
| C           | -0.534   | -5.33    | 0.025    |
| C           | 0.379    | -5.489   | -1.029   |
| C           | -1.803   | -5.915   | -0.1     |
| C           | -2.138   | -6.661   | -1.231   |
| C           | 0.047    | -6.234   | -2.161   |
| C           | -1.211   | -6.83    | -2.264   |
| H           | -2.542   | -5.776   | 0.694    |
| H           | -3.132   | -7.112   | -1.306   |
| H           | -1.469   | -7.418   | -3.149   |
| H           | 0.773    | -6.338   | -2.973   |
| H           | 1.363    | -5.014   | -0.962   |

|   |        |        |        |
|---|--------|--------|--------|
| H | 0.949  | -4.319 | 1.174  |
| H | 0.084  | -6.2   | 2.609  |
| H | -1.488 | -5.36  | 2.745  |
| C | -3.243 | -2.855 | -2.351 |
| C | -1.464 | -3.065 | -3.966 |
| C | -0.244 | 1.29   | 4.021  |
| C | -2.763 | -3.369 | -3.558 |
| C | -0.814 | 2.546  | 6.027  |
| C | -0.161 | 1.602  | 6.823  |
| H | 0.843  | -0.54  | 4.375  |
| H | 0.955  | -0.252 | 6.829  |
| H | -0.134 | 1.721  | 7.91   |
| C | -1.118 | -1.735 | -1.962 |
| C | -0.836 | -3.147 | 1.25   |
| C | -2.429 | -2.047 | -1.557 |
| O | -2.057 | -3.055 | 1.333  |
| C | -0.648 | -2.254 | -3.177 |
| C | -1.44  | 3.6    | -2.225 |
| C | -0.391 | 3.494  | -1.252 |
| C | 0.086  | 2.194  | -0.835 |
| C | -0.513 | 1.038  | -1.365 |
| C | -1.558 | 1.183  | -2.32  |
| C | -1.997 | 2.411  | -2.748 |
| C | -1.896 | 4.878  | -2.643 |

|   |        |        |        |
|---|--------|--------|--------|
| C | -1.357 | 6.032  | -2.117 |
| C | -0.337 | 5.939  | -1.143 |
| C | 0.132  | 4.71   | -0.724 |
| C | 1.253  | 2.19   | 0.113  |
| C | 2.53   | 2.622  | -0.395 |
| C | 3.649  | 2.771  | 0.495  |
| C | 3.463  | 2.504  | 1.872  |
| C | 2.249  | 2.07   | 2.346  |
| C | 1.13   | 1.898  | 1.481  |
| C | 2.744  | 2.924  | -1.77  |
| C | 3.976  | 3.33   | -2.238 |
| C | 5.072  | 3.466  | -1.355 |
| C | 4.904  | 3.195  | -0.014 |
| P | -0.069 | -0.704 | -0.832 |
| P | -0.314 | 0.982  | 2.186  |
| C | 1.615  | -0.911 | -1.58  |
| C | -1.841 | 1.889  | 1.717  |
| C | 2.513  | -1.835 | -1.03  |
| C | 3.765  | -2.044 | -1.614 |
| C | 4.139  | -1.323 | -2.75  |
| C | 3.252  | -0.399 | -3.305 |
| C | 1.997  | -0.199 | -2.729 |
| C | -1.894 | 3.286  | 1.612  |
| C | -3.096 | 3.929  | 1.316  |



|   |        |        |        |
|---|--------|--------|--------|
| C | -4.262 | 3.182  | 1.13   |
| C | -4.218 | 1.789  | 1.23   |
| C | -3.012 | 1.143  | 1.513  |
| C | -0.854 | 2.395  | 4.639  |
| C | 0.396  | 0.342  | 4.834  |
| C | 0.449  | 0.501  | 6.219  |
| H | -2.013 | 0.29   | -2.748 |
| H | -2.786 | 2.478  | -3.505 |
| H | -2.689 | 4.926  | -3.395 |
| H | -1.709 | 7.014  | -2.447 |
| H | 0.086  | 6.85   | -0.712 |
| H | 0.916  | 4.671  | 0.034  |
| H | 4.306  | 2.633  | 2.558  |
| H | 2.134  | 1.86   | 3.412  |
| H | 1.912  | 2.831  | -2.468 |
| H | 4.109  | 3.543  | -3.303 |
| H | 6.047  | 3.785  | -1.734 |
| H | 5.742  | 3.291  | 0.683  |
| H | 2.231  | -2.38  | -0.128 |
| H | 4.456  | -2.766 | -1.169 |
| H | 5.123  | -1.478 | -3.202 |
| H | 3.537  | 0.178  | -4.19  |
| H | 1.306  | 0.52   | -3.175 |
| H | -0.985 | 3.877  | 1.744  |

|    |        |        |        |
|----|--------|--------|--------|
| H  | -3.117 | 5.017  | 1.215  |
| H  | -5.204 | 3.687  | 0.896  |
| H  | -5.125 | 1.199  | 1.074  |
| H  | -2.975 | 0.051  | 1.575  |
| Rh | -0.129 | -1.292 | 1.445  |
| H  | -2.807 | -1.674 | -0.603 |
| H  | -1.307 | 3.406  | 6.49   |
| H  | -1.384 | 3.14   | 4.043  |
| H  | -1.073 | -3.468 | -4.904 |
| H  | 0.365  | -2.023 | -3.512 |
| H  | -3.397 | -4.014 | -4.172 |
| H  | -4.254 | -3.102 | -2.014 |
| H  | -0.022 | -4.607 | 3.421  |
| C  | 1.379  | -1.857 | 2.389  |
| O  | 2.44   | -2.169 | 2.782  |

**Table S10** Optimized Cartesian coordinates involved in Fig. 6 for S5

| <b>Atom</b> | <b>X</b> | <b>Y</b> | <b>Z</b> |
|-------------|----------|----------|----------|
| C           | -0.793   | -4.345   | 2.871    |
| C           | -0.162   | -4.611   | 1.51     |
| C           | -1.081   | -5.345   | 0.536    |
| C           | -0.527   | -6.048   | -0.549   |
| C           | -2.475   | -5.38    | 0.699    |
| C           | -3.284   | -6.125   | -0.167   |

|   |        |        |        |
|---|--------|--------|--------|
| C | -1.331 | -6.783 | -1.418 |
| C | -2.715 | -6.834 | -1.226 |
| H | -2.944 | -4.844 | 1.528  |
| H | -4.366 | -6.155 | -0.003 |
| H | -3.345 | -7.431 | -1.891 |
| H | -0.872 | -7.323 | -2.252 |
| H | 0.553  | -6.01  | -0.706 |
| H | 0.707  | -5.276 | 1.669  |
| H | -1.186 | -5.287 | 3.288  |
| H | -1.614 | -3.617 | 2.821  |
| C | -2.475 | -3.208 | -2.548 |
| C | -0.74  | -3.167 | -4.221 |
| C | -0.192 | 1.129  | 3.835  |
| C | -1.992 | -3.608 | -3.796 |
| C | -0.952 | 2.218  | 5.877  |
| C | -0.133 | 1.392  | 6.647  |
| H | 1.192  | -0.503 | 4.151  |
| H | 1.283  | -0.243 | 6.604  |
| H | -0.114 | 1.493  | 7.735  |
| C | -0.462 | -1.893 | -2.17  |
| H | -1.299 | -1.682 | 1.063  |
| C | -1.711 | -2.369 | -1.739 |
| C | 0.025  | -2.321 | -3.413 |
| C | -1.712 | 3.32   | -2.188 |

|   |        |        |        |
|---|--------|--------|--------|
| C | -0.569 | 3.367  | -1.323 |
| C | 0.115  | 2.146  | -0.967 |
| C | -0.324 | 0.927  | -1.506 |
| C | -1.447 | 0.92   | -2.379 |
| C | -2.127 | 2.07   | -2.699 |
| C | -2.409 | 4.514  | -2.51  |
| C | -1.997 | 5.73   | -2.009 |
| C | -0.868 | 5.789  | -1.162 |
| C | -0.173 | 4.644  | -0.829 |
| C | 1.274  | 2.272  | -0.02  |
| C | 2.503  | 2.834  | -0.515 |
| C | 3.605  | 3.05   | 0.383  |
| C | 3.439  | 2.728  | 1.751  |
| C | 2.258  | 2.199  | 2.214  |
| C | 1.162  | 1.947  | 1.341  |
| C | 2.685  | 3.197  | -1.88  |
| C | 3.879  | 3.721  | -2.333 |
| C | 4.96   | 3.92   | -1.444 |
| C | 4.82   | 3.59   | -0.113 |
| P | 0.457  | -0.719 | -1.065 |
| P | -0.219 | 0.887  | 1.988  |
| C | 2.109  | -0.611 | -1.888 |
| C | -1.791 | 1.733  | 1.541  |
| C | 3.203  | -1.292 | -1.336 |

|   |        |        |        |
|---|--------|--------|--------|
| C | 4.447  | -1.262 | -1.971 |
| C | 4.61   | -0.567 | -3.17  |
| C | 3.523  | 0.104  | -3.735 |
| C | 2.282  | 0.086  | -3.096 |
| C | -1.917 | 3.132  | 1.589  |
| C | -3.154 | 3.738  | 1.371  |
| C | -4.278 | 2.957  | 1.093  |
| C | -4.158 | 1.567  | 1.029  |
| C | -2.921 | 0.958  | 1.249  |
| C | -0.979 | 2.093  | 4.487  |
| C | 0.608  | 0.286  | 4.625  |
| C | 0.647  | 0.422  | 6.014  |
| H | -1.784 | -0.024 | -2.806 |
| H | -2.988 | 2.028  | -3.374 |
| H | -3.279 | 4.445  | -3.17  |
| H | -2.541 | 6.645  | -2.26  |
| H | -0.537 | 6.755  | -0.769 |
| H | 0.692  | 4.72   | -0.169 |
| H | 4.267  | 2.909  | 2.443  |
| H | 2.162  | 1.957  | 3.274  |
| H | 1.864  | 3.047  | -2.583 |
| H | 3.99   | 3.985  | -3.389 |
| H | 5.903  | 4.333  | -1.813 |
| H | 5.648  | 3.734  | 0.587  |

|    |        |        |        |
|----|--------|--------|--------|
| H  | 3.07   | -1.867 | -0.421 |
| H  | 5.291  | -1.789 | -1.517 |
| H  | 5.587  | -0.542 | -3.661 |
| H  | 3.642  | 0.653  | -4.673 |
| H  | 1.437  | 0.616  | -3.544 |
| H  | -1.039 | 3.75   | 1.792  |
| H  | -3.235 | 4.827  | 1.406  |
| H  | -5.246 | 3.435  | 0.922  |
| H  | -5.032 | 0.95   | 0.804  |
| H  | -2.819 | -0.13  | 1.199  |
| Rh | 0.273  | -1.361 | 1.288  |
| H  | -2.076 | -2.088 | -0.749 |
| H  | -1.584 | 2.97   | 6.358  |
| H  | -1.639 | 2.742  | 3.911  |
| H  | -0.342 | -3.491 | -5.187 |
| H  | 1.01   | -2.002 | -3.758 |
| H  | -2.586 | -4.276 | -4.426 |
| H  | -3.438 | -3.574 | -2.186 |
| H  | -0.047 | -3.948 | 3.576  |
| C  | 0.516  | -3.388 | 0.778  |
| O  | 1.271  | -3.666 | -0.139 |
| C  | 2.103  | -1.323 | 1.901  |
| H  | -0.212 | -1.868 | 2.713  |
| O  | 3.164  | -1.382 | 2.37   |

---

**Table S11** Optimized Cartesian coordinates involved in Fig. 6 for S6

| Atom | X      | Y      | Z      |
|------|--------|--------|--------|
| C    | -0.715 | -4.828 | 2.933  |
| C    | -0.112 | -5.168 | 1.584  |
| C    | -1.097 | -5.766 | 0.558  |
| C    | -0.626 | -6.516 | -0.538 |
| C    | -2.485 | -5.66  | 0.735  |
| C    | -3.375 | -6.277 | -0.146 |
| C    | -1.516 | -7.126 | -1.421 |
| C    | -2.897 | -7.014 | -1.232 |
| H    | -2.882 | -5.101 | 1.579  |
| H    | -4.447 | -6.178 | 0.012  |
| H    | -3.604 | -7.502 | -1.925 |
| H    | -1.137 | -7.697 | -2.273 |
| H    | 0.446  | -6.625 | -0.698 |
| H    | 0.648  | -5.944 | 1.728  |
| H    | -1.264 | -5.675 | 3.376  |
| H    | -1.39  | -3.955 | 2.827  |
| C    | -2.496 | -3.097 | -2.207 |
| C    | -0.882 | -3.156 | -4     |
| C    | -0.265 | 1.209  | 3.826  |
| C    | -2.098 | -3.572 | -3.458 |
| C    | -1.078 | 2.301  | 5.834  |

|   |        |        |        |
|---|--------|--------|--------|
| C | -0.267 | 1.487  | 6.621  |
| H | 1.139  | -0.393 | 4.142  |
| H | 1.179  | -0.118 | 6.62   |
| H | -0.282 | 1.591  | 7.708  |
| C | -0.469 | -1.758 | -2.058 |
| H | -1.16  | -1.431 | 1.723  |
| C | -1.68  | -2.208 | -1.506 |
| C | -0.07  | -2.253 | -3.311 |
| C | -1.611 | 3.485  | -2.277 |
| C | -0.504 | 3.521  | -1.365 |
| C | 0.161  | 2.292  | -0.983 |
| C | -0.264 | 1.075  | -1.535 |
| C | -1.348 | 1.076  | -2.453 |
| C | -2.006 | 2.231  | -2.807 |
| C | -2.29  | 4.684  | -2.628 |
| C | -1.896 | 5.901  | -2.11  |
| C | -0.81  | 5.954  | -1.207 |
| C | -0.136 | 4.801  | -0.844 |
| C | 1.284  | 2.403  | 0.003  |
| C | 2.524  | 2.998  | -0.436 |
| C | 3.591  | 3.222  | 0.498  |
| C | 3.373  | 2.904  | 1.862  |
| C | 2.195  | 2.331  | 2.272  |
| C | 1.148  | 2.039  | 1.357  |



|   |        |        |        |
|---|--------|--------|--------|
| C | 2.755  | 3.357  | -1.795 |
| C | 3.966  | 3.874  | -2.21  |
| C | 5.017  | 4.072  | -1.284 |
| C | 4.825  | 3.753  | 0.044  |
| P | 0.511  | -0.561 | -1.045 |
| P | -0.206 | 0.937  | 1.996  |
| C | 2.117  | -0.495 | -1.995 |
| C | -1.811 | 1.754  | 1.476  |
| C | 3.204  | -1.265 | -1.553 |
| C | 4.402  | -1.292 | -2.273 |
| C | 4.537  | -0.548 | -3.445 |
| C | 3.466  | 0.22   | -3.899 |
| C | 2.266  | 0.251  | -3.182 |
| C | -1.962 | 3.162  | 1.473  |
| C | -3.208 | 3.744  | 1.216  |
| C | -4.323 | 2.952  | 0.951  |
| C | -4.19  | 1.566  | 0.957  |
| C | -2.948 | 0.974  | 1.209  |
| C | -1.078 | 2.172  | 4.447  |
| C | 0.534  | 0.381  | 4.627  |
| C | 0.545  | 0.529  | 6.012  |
| H | -1.676 | 0.136  | -2.893 |
| H | -2.849 | 2.196  | -3.513 |
| H | -3.13  | 4.621  | -3.328 |

|    |        |        |        |
|----|--------|--------|--------|
| H  | -2.42  | 6.817  | -2.393 |
| H  | -0.493 | 6.919  | -0.798 |
| H  | 0.697  | 4.875  | -0.14  |
| H  | 4.17   | 3.1    | 2.583  |
| H  | 2.055  | 2.11   | 3.33   |
| H  | 1.961  | 3.201  | -2.525 |
| H  | 4.118  | 4.127  | -3.263 |
| H  | 5.975  | 4.478  | -1.623 |
| H  | 5.632  | 3.9    | 0.77   |
| H  | 3.1    | -1.855 | -0.64  |
| H  | 5.234  | -1.896 | -1.904 |
| H  | 5.48   | -0.564 | -3.997 |
| H  | 3.564  | 0.804  | -4.817 |
| H  | 1.435  | 0.855  | -3.558 |
| H  | -1.113 | 3.817  | 1.674  |
| H  | -3.296 | 4.833  | 1.197  |
| H  | -5.284 | 3.416  | 0.729  |
| H  | -5.054 | 0.938  | 0.749  |
| H  | -2.845 | -0.117 | 1.216  |
| Rh | 0.414  | -1.11  | 1.359  |
| H  | -1.957 | -1.868 | -0.505 |
| H  | -1.725 | 3.047  | 6.295  |
| H  | -1.723 | 2.82   | 3.85   |
| H  | -0.555 | -3.531 | -4.973 |

|   |        |        |        |
|---|--------|--------|--------|
| H | 0.884  | -1.935 | -3.741 |
| H | -2.732 | -4.271 | -4.005 |
| H | -3.433 | -3.439 | -1.755 |
| H | 0.094  | -4.522 | 3.625  |
| C | 0.696  | -3.966 | 1.039  |
| O | 1.505  | -4.036 | 0.16   |
| C | 2.347  | -1.279 | 1.868  |
| H | 0.583  | -2.966 | 1.644  |
| O | 3.39   | -1.676 | 2.18   |

---

1. W. Alsalahi, A. M. Trzeciak, *ChemistrySelect*, 2018, **3**, 1727-1736.
2. T. Wang, W. Wang, Y. Lyu, K. Xiong, C. Li, H. Zhang, Z. Zhan, Z. Jiang, Y. Ding, *Chinese Journal of Catalysis*, 2017, **38**, 691-698.
3. K. Wang, X. Liu, B. Liu, Z. Guo, C. Zhang, Z. Lv, *Journal of Organometallic Chemistry*, 2021, **948**, 121931.
4. D. Han, X. Li, H. Zhang, Z. Liu, G. Hu, C. Li, *Journal of Molecular Catalysis A: Chemical*, 2008, **283**, 15-22.
5. D. Han, X. Li, H. Zhang, Z. Liu, J. Li, C. Li, *Journal of Catalysis*, 2006, **243**, 318-328.
6. Y. Chen, Y. Qi, H. Gong, *Computational and Theoretical Chemistry*, 2022, **1213**, 113743.
7. J. C. Sancho-García, A. J. Pérez-Jiménez, *Journal of Physics B Atomic Molecular & Optical Physics*, 2002, **35**, 1509-1523.

## Reference
